# Supplementary material
Source: PubMed Central journal article supplement (PMC5580495)
Supplement: NIHMS798273-supplement-supplement_1.pdf [file NIHMS798273-supplement-supplement_1.pdf]

| <b>Drug</b>     | <b>Sponsor</b>                      | <b>Stage</b> | <b>Mode of Action</b>               |
|-----------------|-------------------------------------|--------------|-------------------------------------|
| MK8931          | Merck                               | Phase 3      | BACE Inhibitor                      |
| E2609           | Biogen Idec                         | Phase 2      | BACE Inhibitor                      |
| NIC5-15         | Humanetics Pharmaceuticals          | Phase 2      | BACE Inhibitor                      |
| AZD3293         | AstraZeneca & Lilly                 | Phase 2/3    | BACE Inhibitor                      |
| CTS-21166       | CoMentis                            | Phase 1      | BACE Inhibitor                      |
| HPP854          | High Point                          | Phase 1      | BACE Inhibitor                      |
| PF-05297909     | Pfizer                              | Phase 1      | BACE Inhibitor                      |
| TAK-070         | Takeda                              | Phase 1      | BACE Inhibitor                      |
| VTP-37948       | Vitae/Boeringer Ingelheim           | Phase 1      | BACE Inhibitor                      |
| Etazolate       | ExonHit Therapeutics                | Phase 2a     | Alpha Secretase Activator           |
| EGCg            | Taiyo International                 | Phase 2/3    | Alpha Secretase Activator           |
| Scyllo-inositol | Transition Therapeutics             | Phase 2      | Alpha Secretase Activator           |
| Begacestat      | Pfizer                              | Phase 1      | Gamma Secretase Inhibitor/Modulator |
| CHF 5074        | CereSpir, Chiesi Pharmaceuticals    | Phase 2      | Gamma Secretase Inhibitor/Modulator |
| EVP-0962        | EnVivo Pharmaceuticals              | Phase 2      | Gamma Secretase Inhibitor/Modulator |
| Atorvastatin    | UBCH Clinic for Alzheimer's Disease | Phase 3      | Gamma Secretase Inhibitor/Modulator |
| Simvastatin     | Mount Sinai School of Medicine      | Phase 3      | Gamma Secretase Inhibitor/Modulator |
| Affitope AD02   | Affris AG                           | Phase 2      | Increased A $\beta$ Clearance       |
| Affitope AD03   | Affris AG                           | Phase 1      | Increased A $\beta$ Clearance       |
| Pioglitazone    | Takeda/Eli Lilly                    | Phase 3      | Decreased A $\beta$ Production      |
| Tramiprosate    | McGill Center                       | Phase 3      | Decreased A $\beta$ Aggregation     |
| PBT2            | Prana Biotechnology                 | Phase 2      | Decreased A $\beta$ Aggregation     |
| UB 311          | United Biomedical, Inc.             | Phase 1      | A $\beta$ Active Immunotherapy      |
| V 950           | Merck                               | Phase 1      | A $\beta$ Active Immunotherapy      |
| CAD 106         | Novartis                            | Phase 2      | A $\beta$ Active Immunotherapy      |
| BAN2401         | Biogen Idec                         | Phase 2      | A $\beta$ Active Immunotherapy      |
| BIIB037         | Biogen Idec                         | Phase 1      | A $\beta$ Active Immunotherapy      |
| Ponezumab       | Pfizer                              | Phase 2      | A $\beta$ Active Immunotherapy      |
| Crenezumab      | AC Immune/Genetech/Roche            | Phase 2/3    | A $\beta$ Active Immunotherapy      |
| Gantenerumab    | Roche                               | Phase 3      | A $\beta$ Active Immunotherapy      |
| Solanezumab     | Eli Lilly                           | Phase 3      | A $\beta$ Active Immunotherapy      |
| AAB-003         | Janssen Pfizer                      | Phase 1      | A $\beta$ Active Immunotherapy      |
| GSK933776       | GlaxoSmithKline                     | Phase 1      | A $\beta$ Active Immunotherapy      |
| SAR228810       | Sanofi                              | Phase 1      | A $\beta$ Active Immunotherapy      |
